# Supplementary material for: Angiogenesis Interactome and Time Course Microarray Data Reveal the Distinct Activation Patterns in Endothelial Cells
Source: PLoS One. 2014 Oct 16;9(10):e110871. doi: 10.1371/journal.pone.0110871 (PMC4199761; doi:10.1371/journal.pone.0110871)
Supplement: Table S4 — Functional enrichment analysis of genes in the negative regulation of angiogenesis. (XLS) [file pone.0110871.s004.xls]

## Sheet: Negative
Supplementary Table S4. Functional enrichment analysis of genes in the negative regulation of angiogenesis
Description	p-value	Adjusted p-value (FDR)	Cluster frequency	Genes
protein binding	4.77e-35	2.45e-32	216/242 89.2%	MEF2C,JUN,MEF2D,HHEX,STAT3,MEF2A,STAT1,FN1,CCL2,TNFSF10,PML,CD36,THBS4,CCL5,CCL13,CCL11,CCL8,IGFBP3,CCL7,EIF4E,MEIS1,TP73,ROCK1,PTK2,IGFBP5,AKT1,AKT2,JAK2,ARRB1,IGFBP7,ARNT,LAMB3,TIE1,MYC,CSNK2A1,MAPK14,COL4A3BP,LDLR,TGFB1,TGFBR2,TGFBR1,TGFBI,CXCR3,CALR,NF1,FOXO1,PROC,PLG,CCR10,JAG1,ANTXR2,SDC2,THBS2,LCK,GTF2I,THBS1,THBD,CASP8,CXCL10,NPY,TSC2,VWF,KNG1,
receptor binding	1.34e-30	3.44e-28	71/242 29.3%	CXCL10,F2,PTPN11,F2R,NPY,TNF,VWF,KNG1,RARA,GNB2L1,CCL2,TNFSF10,ANGPT2,ANGPT1,VTN,THBS4,CCL5,CCL13,CCL11,FGF2,CCL8,CREBBP,CCL7,INS,IL8,NCOR2,COL4A3,LRP1,PDPK1,ITGB3,RB1,TNFRSF11B,JAK2,ARRB1,ARNT,SPP1,GRB2,SERPINE2,LEP,SMAD3,SMAD2,SAA1,NPPB,EP300,NPPA,OSM,CTNNB1,TGFB1,DPP4,AR,TGFBR2,TGFBR1,TGFBI,CALR,SRC,PTEN,IL6ST,PDGFB,BMP3,PF4,FGA,APP,MED1
enzyme binding	3.66e-20	6.27e-18	48/242 19.8%	PDE3B,FOXO4,PTPN11,STAT3,CORO1A,MEF2A,EP300,PRKCA,SERPINA5,RELA,VWF,RARA,GNB2L1,FURIN,PML,CTNNB1,HDAC5,CBX5,DPP4,TGFBR1,SERPINA1,PLAUR,NPR1,CCND1,CALR,ROCK1,NCOR2,PTEN,RAP1A,ANXA2,LRP1,PRKACA,PDPK1,MDM2,RB1,SP1,AKT1,TP53,SERPINE1,JAK2,ARRB1,FAS,HDAC1,SMAD3,PIK3R1,LCK,CDH1,SMAD2
glycosaminoglycan binding	7.52e-18	9.66e-16	24/242 9.9%	TNFAIP6,HRG,SERPINA5,PF4,KNG1,FN1,CCL2,APOH,APP,HABP2,STAB1,THBS4,VTN,CTSG,FGF2,SERPINE2,CCL8,CCL7,THBS3,DCN,THBS2,TGFBR2,VCAN,THBS1
promoter binding	5.11e-17	5.25e-15	21/242 8.6%	JUN,SRF,YY1,HHEX,EP300,RELA,TNF,RARA,GATA6,ESR1,SP1,TP53,CTNNB1,ARRB1,AR,SMAD3,SMAD4,TP73,FOS,MYC,SMAD2,
pattern binding	7.52e-17	5.52e-15	24/242 9.9%	TNFAIP6,HRG,SERPINA5,PF4,KNG1,FN1,CCL2,APOH,APP,HABP2,STAB1,THBS4,VTN,CTSG,FGF2,SERPINE2,CCL8,CCL7,THBS3,DCN,THBS2,TGFBR2,VCAN,THBS1
polysaccharide binding	7.52e-17	5.52e-15	24/242 9.9%	TNFAIP6,HRG,SERPINA5,PF4,KNG1,FN1,CCL2,APOH,APP,HABP2,STAB1,THBS4,VTN,CTSG,FGF2,SERPINE2,CCL8,CCL7,THBS3,DCN,THBS2,TGFBR2,VCAN,THBS1
DNA regulatory region binding	1.08e-16	6.93e-15	21/242 8.6%	JUN,SRF,YY1,HHEX,EP300,RELA,TNF,RARA,GATA6,ESR1,SP1,TP53,CTNNB1,ARRB1,AR,SMAD3,SMAD4,TP73,FOS,MYC,SMAD2,
heparin binding	1.12e-13	6.42e-12	18/242 7.4%	HRG,SERPINA5,PF4,KNG1,FN1,CCL2,APOH,APP,THBS4,VTN,CTSG,FGF2,SERPINE2,CCL8,CCL7,THBS3,THBS2,THBS1
cytokine receptor binding	1.61e-13	8.26e-12	22/242 9.0%	CXCL10,IL6ST,PF4,TNF,OSM,ITGB3,CCL2,TNFSF10,JAK2,CCL5,TGFB1,LIF,CCL13,FASLG,CCL11,CCL8,CCL7,SMAD3,TGFBR2,TGFBR1,IL8,SMAD2
transcription activator activity	2.05e-13	9.58e-12	32/242 13.2%	JUN,MEF2D,FOXO4,STAT3,MEF2A,EP300,RELA,TNF,RARA,GATA6,PML,CTNNB1,TGFB1,CREBBP,AR,TP73,YY1,FOXO1,TP63,RB1,SP1,TP53,MED1,NR4A1,ARNT,HDAC1,SMAD3,SMAD4,KLF4,MYC,SMAD2,CDH1
collagen binding	3.15e-13	1.35e-11	12/242 4.9%	SRGN,PDGFB,MMP9,DPP4,SMAD3,VWF,DCN,SMAD4,USH2A,FN1,SPARC,THBS1
protein complex binding	4.22e-13	1.67e-11	24/242 9.9%	CCND1,CALR,SRC,PTPN11,EP300,COL4A3,RELA,LRP1,PRKACA,VWF,PDPK1,ITGB3,ESR1,CDKN1A,TNFRSF1A,CTNNB1,THBS4,VTN,LAMB3,INS,TGFBR1,PIK3R1,TGFBI,THBS1
binding	5.76e-13	2.11e-11	232/242 95.8%	MEF2C,JUN,MEF2D,HHEX,STAT3,MEF2A,STAT1,FN1,CCL2,TNFSF10,PML,CD36,THBS4,CCL5,CCL13,CCL11,CCL8,IGFBP3,CCL7,EIF4E,MEIS1,TP73,ROCK1,PTK2,IGFBP5,AKT1,AKT2,JAK2,ARRB1,IGFBP7,ARNT,LAMB3,TIE1,MYC,CSNK2A1,MAPK14,COL4A3BP,LDLR,TGFB1,TGFBR2,VCAN,TGFBR1,TGFBI,CXCR3,CALR,NF1,FOXO1,PROC,PLG,CCR10,JAG1,ANTXR2,SDC2,THBS3,THBS2,LCK,GTF2I,THBS1,THBD,CASP8,CXCL10,MATN2,NPY
sequence-specific DNA binding	7.46e-11	2.56e-09	35/242 14.4%	JUN,MEF2C,SRF,MEF2D,HHEX,FOXO4,STAT3,PBX1,MEF2A,GATA2,EP300,STAT1,RELA,TNF,RARA,GATA6,ESR1,CTNNB1,AR,MEIS1,TP73,NCOR2,HOXA5,YY1,FOXO1,TP63,SP1,TP53,ARRB1,NR4A1,SMAD3,SMAD4,FOS,MYC,SMAD2,
cytokine binding	1.15e-10	3.57e-09	15/242 6.1%	CCRL1,IL6ST,CCR1,CD36,TNFRSF1A,CCR3,CCR10,CCR5,CCBP2,TGFBR2,TGFBR1,THBS1,DARC,CXCR3,EPOR
SMAD binding	1.18e-10	3.57e-09	11/242 4.5%	JUN,EP300,CREBBP,SMAD3,SMAD4,TGFBR2,FOS,PML,TGFBR1,CTNNB1,SMAD2,
molecular transducer activity	1.82e-10	4.92e-09	71/242 29.3%	AMOT,F2,STAT3,F2R,NPY,STAT1,RARA,CCL2,ESR1,CD36,TNFRSF6B,VTN,CCL5,ITGA4,ITGA3,RHOC,CCL13,CCL8,CREBBP,BAI1,PLAUR,PTK2,MAPK11,LRP1,ITGB3,TNFRSF11B,TNFRSF1A,JAK2,CCR3,STAB1,ITGAV,CCR5,ITGB1,VLDLR,ARNT,GRB2,CCBP2,TIE1,MAPK3,SMAD3,SMAD4,MAPK7,EPOR,SMAD2,CCRL1,MAPK8,MAPK14,CCR1,CD47,CTNNB1,LDLR,DPP4,AR,PTPRM,TGFBR2,TGFBR1,NPR3,CXCR3,NPR1,SRC,ACE2,IL6ST,TEK,
signal transducer activity	1.82e-10	4.92e-09	71/242 29.3%	AMOT,F2,STAT3,F2R,NPY,STAT1,RARA,CCL2,ESR1,CD36,TNFRSF6B,VTN,CCL5,ITGA4,ITGA3,RHOC,CCL13,CCL8,CREBBP,BAI1,PLAUR,PTK2,MAPK11,LRP1,ITGB3,TNFRSF11B,TNFRSF1A,JAK2,CCR3,STAB1,ITGAV,CCR5,ITGB1,VLDLR,ARNT,GRB2,CCBP2,TIE1,MAPK3,SMAD3,SMAD4,MAPK7,EPOR,SMAD2,CCRL1,MAPK8,MAPK14,CCR1,CD47,CTNNB1,LDLR,DPP4,AR,PTPRM,TGFBR2,TGFBR1,NPR3,CXCR3,NPR1,SRC,ACE2,IL6ST,TEK
carbohydrate binding	6.01e-10	1.54e-08	25/242 10.3%	SERPINA5,KNG1,FN1,CCL2,HABP2,VTN,THBS4,FGF2,CCL8,CCL7,TGFBR2,VCAN,CALR,TNFAIP6,HRG,PF4,APOH,APP,STAB1,CTSG,SERPINE2,THBS3,THBS2,DCN,THBS1
transcription factor binding	7.77e-10	1.9e-08	30/242 12.3%	JUN,TWIST1,SRF,IRF3,HHEX,FOXO4,STAT3,GATA2,PBX1,EP300,RELA,RARA,GATA6,PML,ESR1,CTNNB1,HDAC5,CREBBP,AR,TP73,NCOR2,YY1,RB1,TP53,MED1,ARRB1,ARNT,HDAC1,SMAD3,SMAD2
protein kinase activity	1.39e-09	3.24e-08	31/242 12.8%	CSNK2A1,MAPK8,MAPK14,PRKCA,CCL2,COL4A3BP,LIMK2,LIMK1,PRKD1,TGFBR2,TGFBR1,ROCK2,NPR1,ROCK1,CCND1,SRC,PTK2,MAPK11,TEK,PRKACA,PDPK1,MAP2K5,AKT1,AKT2,JAK2,TIE1,MAPK3,FYN,MAPK7,PRKG1,LCK,
chemokine receptor activity	1.92e-09	4.11e-08	8/242 3.3%	CCR3,CCRL1,CCR10,CCR5,CCBP2,CCR1,DARC,CXCR3
G-protein chemoattractant receptor activity	1.92e-09	4.11e-08	8/242 3.3%	CCR3,CCRL1,CCR10,CCR5,CCBP2,CCR1,DARC,CXCR3
C-C chemokine binding	2.16e-09	4.27e-08	7/242 2.8%	CCR3,CCRL1,CCR10,CCR5,CCBP2,CCR1,CXCR3,
C-C chemokine receptor activity	2.16e-09	4.27e-08	7/242 2.8%	CCR3,CCRL1,CCR10,CCR5,CCBP2,CCR1,CXCR3,
enzyme inhibitor activity	3.01e-09	5.74e-08	21/242 8.6%	TFPI,TWIST1,ANXA2,HRG,SERPINA5,COL7A1,COL4A3,SERPINF1,PRKACA,KNG1,FURIN,CDKN1A,SLPI,SERPINE1,CASP3,APP,SERPINB2,ARRB1,SERPINE2,LPA,SERPINA1
chemokine binding	3.97e-09	7.28e-08	8/242 3.3%	CCR3,CCRL1,CCR10,CCR5,CCBP2,CCR1,DARC,CXCR3
kinase binding	4.42e-09	7.84e-08	18/242 7.4%	CCND1,PDE3B,STAT3,MEF2A,CORO1A,EP300,RELA,PRKACA,PDPK1,RB1,TP53,JAK2,CTNNB1,HDAC5,FAS,SMAD3,LCK,NPR1
transcription regulator activity	4.69e-09	8.04e-08	54/242 22.3%	MEF2C,JUN,MEF2D,TWIST1,SRF,HHEX,FOXO4,STAT3,MEF2A,ZBTB16,STAT1,TNF,RARA,PML,ESR1,CBX5,CREBBP,MEIS1,TP73,NCOR2,HOXA5,TP63,MDM2,RB1,ARNT,SMAD3,MAPK3,KLF4,SMAD4,MYC,SMAD2,IRF3,RUNX3,GATA2,PBX1,EP300,RELA,GATA6,CTNNB1,HDAC5,TGFB1,AR,CALR,YY1,FOXO1,SP1,TP53,MED1,EGR3,NR4A1,HDAC1,FOS,GTF2I,CDH1
R-SMAD binding	6.02e-09	9.98e-08	6/242 2.4%	JUN,SMAD3,SMAD4,FOS,CTNNB1,SMAD2
protease binding	7.68e-09	1.23e-07	8/242 3.3%	DPP4,SERPINA5,LRP1,VWF,FURIN,TP53,SERPINA1,SERPINE1
identical protein binding	8.8e-09	1.37e-07	33/242 13.6%	SRF,CASP8,HHEX,ZBTB16,CORO1A,RELA,TNF,TSC2,VWF,PML,ITGA4,TGFB1,DPP4,PTP4A3,NPR3,ROCK1,IL6ST,PDGFB,TP63,ITGB3,MDM2,SP1,AKT1,APP,FAS,ITGB1,NR4A1,HDAC1,SMAD3,COL1A1,FYN,SMAD4,THBS1
transcription factor activity	9.11e-09	1.38e-07	40/242 16.5%	JUN,MEF2C,IRF3,SRF,MEF2D,HHEX,FOXO4,STAT3,PBX1,ZBTB16,GATA2,MEF2A,RUNX3,STAT1,RELA,RARA,GATA6,ESR1,CTNNB1,CREBBP,AR,MEIS1,TP73,HOXA5,YY1,FOXO1,TP63,RB1,SP1,TP53,EGR3,NR4A1,ARNT,HDAC1,SMAD3,KLF4,FOS,GTF2I,MYC,SMAD2
endopeptidase inhibitor activity	9.37e-09	1.38e-07	15/242 6.1%	TFPI,HRG,SERPINA5,COL7A1,COL4A3,SERPINF1,KNG1,FURIN,SLPI,SERPINE1,APP,SERPINB2,SERPINE2,LPA,SERPINA1,
endopeptidase regulator activity	1.03e-08	1.47e-07	15/242 6.1%	TFPI,HRG,SERPINA5,COL7A1,COL4A3,SERPINF1,KNG1,FURIN,SLPI,SERPINE1,APP,SERPINB2,SERPINE2,LPA,SERPINA1,
cytokine activity	1.35e-08	1.88e-07	17/242 7.0%	CXCL10,BMP3,PF4,TNF,OSM,CCL2,TNFSF10,TNFRSF11B,CCL5,CCL13,LIF,FASLG,CCL11,SPP1,CCL8,CCL7,IL8
peptidase inhibitor activity	2.12e-08	2.87e-07	15/242 6.1%	TFPI,HRG,SERPINA5,COL7A1,COL4A3,SERPINF1,KNG1,FURIN,SLPI,SERPINE1,APP,SERPINB2,SERPINE2,LPA,SERPINA1,
serine-type endopeptidase inhibitor activity	2.27e-08	2.99e-07	12/242 4.9%	TFPI,HRG,SERPINE2,COL7A1,SERPINA5,SERPINF1,FURIN,SLPI,SERPINA1,SERPINE1,APP,SERPINB2
chemokine activity	3.98e-08	5.12e-07	9/242 3.7%	CCL5,CXCL10,CCL13,CCL11,CCL8,CCL7,PF4,CCL2,IL8
phosphotransferase activity, alcohol group as acceptor	9.38e-08	1.18e-06	31/242 12.8%	CSNK2A1,MAPK8,MAPK14,PRKCA,CCL2,COL4A3BP,LIMK2,LIMK1,PRKD1,TGFBR2,TGFBR1,ROCK2,NPR1,ROCK1,CCND1,SRC,PTK2,MAPK11,TEK,PRKACA,PDPK1,MAP2K5,AKT1,AKT2,JAK2,TIE1,MAPK3,FYN,MAPK7,PRKG1,LCK,
chemokine receptor binding	1e-07	1.2e-06	9/242 3.7%	CCL5,CXCL10,CCL13,CCL11,CCL8,CCL7,PF4,CCL2,IL8,
growth factor binding	1e-07	1.2e-06	12/242 4.9%	IGFBP7,COL4A1,IL6ST,PDGFB,IGFBP3,COL1A1,FURIN,TGFBR2,IGFBP5,TGFBR1,THBS1,CD36
peptidase regulator activity	1.35e-07	1.57e-06	15/242 6.1%	TFPI,HRG,SERPINA5,COL7A1,COL4A3,SERPINF1,KNG1,FURIN,SLPI,SERPINE1,APP,SERPINB2,SERPINE2,LPA,SERPINA1
serine-type endopeptidase activity	1.51e-07	1.72e-06	14/242 5.7%	F10,F2,MMP8,FURIN,PROC,PLG,HABP2,KLK3,CTSG,DPP4,PLAT,F12,LPA,PLAU
kinase activity	1.89e-07	2.12e-06	32/242 13.2%	CSNK2A1,MAPK8,MAPK14,PRKCA,CCL2,COL4A3BP,LIMK2,LIMK1,PRKD1,TGFBR2,TGFBR1,ROCK2,NPR1,ROCK1,CCND1,SRC,PTK2,MAPK11,TEK,PRKACA,PDPK1,MAGI3,MAP2K5,AKT1,AKT2,JAK2,TIE1,MAPK3,FYN,MAPK7,PRKG1,LCK
G-protein-coupled receptor binding	2e-07	2.19e-06	13/242 5.3%	CXCL10,SAA1,NPY,PF4,CCL2,GHRL,CCL5,ARRB1,CCL13,CCL11,CCL8,CCL7,IL8,
endopeptidase activity	4.43e-07	4.75e-06	21/242 8.6%	F10,MMP3,CASP8,MMP2,F2,MMP1,MMP9,MMP8,MMP7,FURIN,PROC,CASP3,HABP2,PLG,KLK3,CTSG,DPP4,F12,PLAT,LPA,PLAU,
integrin binding	5.56e-07	5.83e-06	9/242 3.7%	VTN,CALR,THBS4,SRC,COL4A3,VWF,ITGB3,TGFBI,THBS1
enzyme regulator activity	5.93e-07	6.1e-06	34/242 14.0%	JUN,TWIST1,CXCL10,SERPINA5,COL7A1,TSC2,KNG1,FURIN,ESR1,CDKN1A,SLPI,KRIT1,IGFBP3,LPA,SERPINA1,CCND1,TFPI,ANXA2,NF1,HRG,COL4A3,SERPINF1,PRKACA,AKT1,APOH,TP53,CASP3,SERPINE1,APP,SERPINB2,GHRL,ARRB1,SERPINE2,PIK3R1
serine-type peptidase activity	7.7e-07	7.76e-06	14/242 5.7%	F10,F2,MMP8,FURIN,PROC,PLG,HABP2,KLK3,CTSG,DPP4,PLAT,F12,LPA,PLAU
serine hydrolase activity	9.43e-07	9.32e-06	14/242 5.7%	F10,F2,MMP8,FURIN,PROC,PLG,HABP2,KLK3,CTSG,DPP4,PLAT,F12,LPA,PLAU
transcription repressor binding	1.05e-06	1.02e-05	5/242 2.0%	HDAC5,CBX5,HHEX,RELA,CTNNB1,
ubiquitin protein ligase binding	1.08e-06	1.03e-05	9/242 3.7%	CALR,ARRB1,RELA,SMAD3,RB1,PML,TGFBR1,TP53,SMAD2,
receptor signaling protein activity	1.15e-06	1.07e-05	13/242 5.3%	MAPK11,MAPK8,STAT3,MAPK14,STAT1,JAK2,SMAD3,MAPK3,SMAD4,TGFBR2,MAPK7,TGFBR1,SMAD2,
protein dimerization activity	1.38e-06	1.27e-05	26/242 10.7%	JUN,SRF,HHEX,STAT3,CORO1A,ZBTB16,PBX1,TSC2,VWF,RARA,PML,TGFB1,DPP4,AR,TGFBR1,NPR3,PDGFB,IL6ST,SP1,TP53,ITGB1,NR4A1,ARNT,SMAD3,SMAD4,FOS
peptide receptor activity	1.59e-06	1.41e-05	11/242 4.5%	CCR3,CCRL1,CCR10,CCR5,F2R,CCBP2,CCR1,NPR3,DARC,NPR1,CXCR3
peptide receptor activity, G-protein coupled	1.59e-06	1.41e-05	11/242 4.5%	CCR3,CCRL1,CCR10,CCR5,F2R,CCBP2,CCR1,NPR3,DARC,NPR1,CXCR3
MAP kinase activity	1.62e-06	1.41e-05	5/242 2.0%	MAPK8,MAPK11,MAPK14,MAPK3,MAPK7
peptide hormone receptor binding	1.98e-06	1.7e-05	4/242 1.6%	PTPN11,NPPA,LEP,JAK2
double-stranded DNA binding	2.33e-06	1.97e-05	10/242 4.1%	JUN,ZBTB16,SMAD3,TP63,GATA6,FOS,SP1,TP53,CTNNB1,SMAD2
protein kinase binding	3.87e-06	3.21e-05	13/242 5.3%	CCND1,PDE3B,STAT3,MEF2A,EP300,RELA,PRKACA,PDPK1,TP53,HDAC5,SMAD3,LCK,NPR1,
peptide binding	4.65e-06	3.79e-05	14/242 5.7%	CCRL1,F2R,CCR1,FURIN,CCR3,CCR10,CCR5,DPP4,CCBP2,NPR3,PIK3R1,DARC,CXCR3,NPR1
transcription repressor activity	5.58e-06	4.48e-05	18/242 7.4%	JUN,CALR,NCOR2,YY1,HHEX,ZBTB16,RELA,TNF,RARA,TP63,MDM2,PML,RB1,HDAC5,CBX5,HDAC1,SMAD3,KLF4
extracellular matrix binding	6.03e-06	4.77e-05	6/242 2.4%	VTN,SPP1,DCN,TGFBI,SPARC,THBS1
transforming growth factor beta receptor binding	6.57e-06	5.12e-05	5/242 2.0%	TGFB1,SMAD3,TGFBR2,TGFBR1,SMAD2,
transferase activity, transferring phosphorus-containing groups	7.1e-06	5.45e-05	32/242 13.2%	CSNK2A1,MAPK8,MAPK14,PRKCA,CCL2,COL4A3BP,LIMK2,LIMK1,PRKD1,TGFBR2,TGFBR1,ROCK2,NPR1,ROCK1,CCND1,SRC,PTK2,MAPK11,TEK,PRKACA,PDPK1,MAGI3,MAP2K5,AKT1,AKT2,JAK2,TIE1,MAPK3,FYN,MAPK7,PRKG1,LCK
protein serine/threonine kinase activity	9.23e-06	6.98e-05	20/242 8.2%	ROCK1,CSNK2A1,MAPK8,MAPK11,MAPK14,PRKCA,PRKACA,PDPK1,MAP2K5,AKT1,AKT2,LIMK2,LIMK1,MAPK3,PRKD1,TGFBR2,MAPK7,TGFBR1,PRKG1,ROCK2
hormone receptor binding	1.15e-05	8.32e-05	9/242 3.7%	CALR,PTPN11,EP300,NPPA,LEP,RB1,MED1,CTNNB1,JAK2
I-SMAD binding	1.15e-05	8.32e-05	4/242 1.6%	SMAD4,TGFBR1,CTNNB1,SMAD2
transforming growth factor beta binding	1.15e-05	8.32e-05	4/242 1.6%	TGFBR2,TGFBR1,THBS1,CD36
receptor activity	1.34e-05	9.59e-05	49/242 20.2%	AMOT,F2,F2R,NPY,RARA,ESR1,CD36,VTN,TNFRSF6B,ITGA4,ITGA3,BAI1,PLAUR,LRP1,ITGB3,TNFRSF11B,TNFRSF1A,STAB1,CCR3,ITGAV,ITGB1,CCR5,VLDLR,TIE1,CCBP2,EPOR,CCRL1,CCR1,CD47,LDLR,DPP4,AR,TGFBR2,PTPRM,TGFBR1,NPR3,NPR1,CXCR3,ACE2,IL6ST,TEK,SCARB2,MED1,CCR10,FAS,ANTXR2,NR4A1,THBD,DARC
low-density lipoprotein binding	1.5e-05	0.000103	5/242 2.0%	STAB1,LDLR,VLDLR,THBS1,CD36
peroxisome proliferator activated receptor binding	1.5e-05	0.000103	3/242 1.2%	EP300,CREBBP,MED1,
thrombospondin receptor activity	1.5e-05	0.000103	3/242 1.2%	F2,CD47,CD36,
lipoprotein binding	1.54e-05	0.000104	6/242 2.4%	STAB1,LDLR,VLDLR,LRP1,THBS1,CD36
structure-specific DNA binding	1.67e-05	0.000111	11/242 4.5%	JUN,ZBTB16,SMAD3,TP63,RARA,GATA6,FOS,SP1,TP53,CTNNB1,SMAD2
chromatin binding	1.73e-05	0.000113	12/242 4.9%	CBX5,NCOR2,HHEX,CREBBP,SMAD4,TP63,RARA,GATA6,TP53,MED1,CTNNB1,SMAD2
calcium ion binding	1.76e-05	0.000113	25/242 10.3%	MATN2,F2,STAT3,STAT1,SPARC,THBS4,LDLR,FBLN2,VCAN,CALR,F10,MMP3,MMP1,ANXA2,MMP8,LRP1,PROC,PLG,JAG1,VLDLR,THBS3,THBS2,THBS1,THBD,CDH1,
apolipoprotein binding	1.78e-05	0.000113	4/242 1.6%	VLDLR,LRP1,LPA,PLG
low-density lipoprotein receptor activity	1.78e-05	0.000113	4/242 1.6%	STAB1,LDLR,VLDLR,CD36
cell adhesion molecule binding	1.83e-05	0.000115	6/242 2.4%	EZR,MSN,PTPRM,ITGB3,CDH1,CTNNB1
insulin receptor substrate binding	2.64e-05	0.000163	4/242 1.6%	PTPN11,GRB2,PIK3R1,JAK2
specific transcriptional repressor activity	2.94e-05	0.00018	6/242 2.4%	HDAC5,NCOR2,YY1,ZBTB16,HDAC1,SMAD3
protein heterodimerization activity	3.53e-05	0.000213	13/242 5.3%	JUN,PDGFB,PBX1,TSC2,RARA,PML,TP53,TGFB1,ITGB1,ARNT,NR4A1,FOS,TGFBR1
receptor signaling protein serine/threonine kinase activity	3.63e-05	0.000217	7/242 2.8%	MAPK8,MAPK11,MAPK14,MAPK3,TGFBR2,MAPK7,TGFBR1
cell surface binding	3.95e-05	0.000231	6/242 2.4%	STAB1,PDGFB,APOH,FGA,THBS1,PLG
glycoprotein binding	3.95e-05	0.000231	6/242 2.4%	ACE2,VWF,FYN,LCK,APOH,THBS1
peptidase activity, acting on L-amino acid peptides	5.75e-05	0.000332	22/242 9.0%	F10,MMP3,CASP8,MMP2,ACE2,F2,MMP1,MMP9,MMP8,MMP7,FURIN,PROC,CASP3,HABP2,PLG,KLK3,CTSG,DPP4,F12,PLAT,LPA,PLAU
lipoprotein receptor activity	7.01e-05	0.0004	4/242 1.6%	STAB1,LDLR,VLDLR,CD36
SAP kinase activity	7.34e-05	0.000415	3/242 1.2%	MAPK8,MAPK11,MAPK14
peptidase activity	9.44e-05	0.000527	22/242 9.0%	F10,MMP3,CASP8,MMP2,ACE2,F2,MMP1,MMP9,MMP8,MMP7,FURIN,PROC,CASP3,HABP2,PLG,KLK3,CTSG,DPP4,F12,PLAT,LPA,PLAU
protein C-terminus binding	0.000108	0.000596	10/242 4.1%	HRAS,BAIAP2,ZBTB16,CORO1A,HSPG2,BAIAP3,SP1,LCK,MAGI1,CTNNB1
phosphoprotein binding	0.000129	0.000706	5/242 2.0%	PDE3B,PIN1,GRB2,MAPK3,RB1,
protein N-terminus binding	0.000185	0.001	7/242 2.8%	CSNK2A1,NCOR2,TGFB1,RELA,VWF,DCN,TP53
protein homodimerization activity	0.000307	0.00165	16/242 6.6%	SRF,HHEX,IL6ST,PDGFB,ZBTB16,CORO1A,VWF,TSC2,PML,SP1,TGFB1,NR4A1,DPP4,SMAD3,SMAD4,NPR3
non-membrane spanning protein tyrosine kinase activity	0.000381	0.00201	5/242 2.0%	SRC,PTK2,FYN,LCK,JAK2,
RNA polymerase II transcription factor activity	0.000384	0.00201	12/242 4.9%	JUN,MEF2C,IRF3,SRF,RELA,SMAD3,MEIS1,GATA6,FOS,SP1,GTF2I,MED1
phosphoinositide 3-kinase binding	0.00042	0.00216	3/242 1.2%	CORO1A,LCK,JAK2,
transforming growth factor beta receptor, cytoplasmic mediator activity	0.00042	0.00216	3/242 1.2%	SMAD3,SMAD4,SMAD2
platelet-derived growth factor binding	0.000571	0.00288	3/242 1.2%	COL4A1,PDGFB,COL1A1
transmembrane receptor protein serine/threonine kinase signaling protein activity	0.000571	0.00288	3/242 1.2%	SMAD3,SMAD4,SMAD2,
steroid hormone receptor binding	0.000664	0.00331	5/242 2.0%	CALR,EP300,RB1,MED1,CTNNB1,
MP kinase activity	0.000726	0.00355	2/242 0.8%	MAPK11,MAPK14
natriuretic peptide receptor activity	0.000726	0.00355	2/242 0.8%	NPR3,NPR1
protein phosphatase binding	0.000736	0.00357	5/242 2.0%	GNB2L1,PIK3R1,TP53,CDH1,CTNNB1
platelet-derived growth factor receptor binding	0.000753	0.00362	3/242 1.2%	PTEN,PDGFB,ITGB3,
SH2 domain binding	0.000777	0.0037	4/242 1.6%	SRC,PTK2,LCK,JAK2
kinase regulator activity	0.000877	0.00414	7/242 2.8%	GHRL,CCND1,CXCL10,PRKACA,CDKN1A,PIK3R1,CASP3,
growth factor activity	0.000952	0.00445	9/242 3.7%	TGFB1,F2,JAG1,PDGFB,LIF,FGF2,LEP,BMP3,OSM,
phosphatase binding	0.00118	0.00548	5/242 2.0%	GNB2L1,PIK3R1,TP53,CDH1,CTNNB1,
insulin-like growth factor receptor binding	0.00122	0.00559	3/242 1.2%	ARRB1,INS,PIK3R1
hormone binding	0.00129	0.00588	5/242 2.0%	AR,ESR1,PIK3R1,NPR3,NPR1,
insulin receptor binding	0.00133	0.00598	4/242 1.6%	PTPN11,PDPK1,INS,PIK3R1
acetylcholine receptor binding	0.00144	0.00631	2/242 0.8%	APP,JAK2
very-low-density lipoprotein binding	0.00144	0.00631	2/242 0.8%	LDLR,VLDLR
very-low-density lipoprotein receptor activity	0.00144	0.00631	2/242 0.8%	LDLR,VLDLR
eukaryotic cell surface binding	0.0015	0.0065	3/242 1.2%	APOH,FGA,THBS1
protein phosphorylated amino acid binding	0.0015	0.0065	3/242 1.2%	PIN1,GRB2,MAPK3
protein tyrosine kinase activity	0.00157	0.00671	8/242 3.3%	SRC,PTK2,TEK,TIE1,FYN,MAP2K5,LCK,JAK2
extracellular matrix structural constituent	0.00169	0.0072	6/242 2.4%	COL4A1,COL4A2,FBLN2,COL4A3,COL1A1,FN1
growth factor receptor binding	0.00181	0.0076	6/242 2.4%	PTEN,PDGFB,GRB2,FGF2,ITGB3,JAK2
transcription coactivator activity	0.00212	0.00887	10/242 4.1%	JUN,YY1,ARNT,EP300,CREBBP,RARA,RB1,PML,MED1,CTNNB1
hematopoietin/interferon-class (D200-domain) cytokine receptor signal transducer activity	0.00237	0.00967	2/242 0.8%	STAT3,STAT1
nitric-oxide synthase regulator activity	0.00237	0.00967	2/242 0.8%	ESR1,AKT1
transforming growth factor beta receptor, pathway-specific cytoplasmic mediator activity	0.00237	0.00967	2/242 0.8%	SMAD3,SMAD2
protein kinase regulator activity	0.00244	0.00988	6/242 2.4%	GHRL,CCND1,CXCL10,PRKACA,CDKN1A,CASP3
cyclin-dependent protein kinase regulator activity	0.00261	0.0103	3/242 1.2%	CCND1,CDKN1A,CASP3,
hyaluronic acid binding	0.00261	0.0103	3/242 1.2%	STAB1,TNFAIP6,VCAN,
protein serine/threonine kinase inhibitor activity	0.00261	0.0103	3/242 1.2%	PRKACA,CDKN1A,CASP3,
insulin-like growth factor I binding	0.00352	0.0138	2/242 0.8%	IGFBP3,IGFBP5
tumor necrosis factor receptor binding	0.0041	0.016	3/242 1.2%	FASLG,TNF,TNFSF10,
C-X-C chemokine receptor activity	0.00488	0.0184	2/242 0.8%	CCBP2,CXCR3
histone kinase activity	0.00488	0.0184	2/242 0.8%	PRKCA,JAK2
type I transforming growth factor beta receptor binding	0.00488	0.0184	2/242 0.8%	TGFBR2,SMAD2
type II transforming growth factor beta receptor binding	0.00488	0.0184	2/242 0.8%	TGFB1,TGFBR1
p53 binding	0.00534	0.02	3/242 1.2%	CREBBP,MDM2,TP73,
metalloendopeptidase activity	0.00562	0.0209	6/242 2.4%	MMP3,MMP2,MMP1,MMP9,MMP8,MMP7
beta-catenin binding	0.00573	0.0212	4/242 1.6%	EP300,AR,SMAD3,CDH1
insulin-like growth factor binding	0.00603	0.0221	3/242 1.2%	IGFBP7,IGFBP3,IGFBP5
bHLH transcription factor binding	0.00643	0.0231	2/242 0.8%	EP300,CREBBP
co-SMAD binding	0.00643	0.0231	2/242 0.8%	SMAD3,SMAD2
C-X-C chemokine binding	0.00643	0.0231	2/242 0.8%	CCBP2,CXCR3
hormone activity	0.00706	0.0252	6/242 2.4%	GHRL,NPPB,NPPA,LEP,NPY,INS
steroid hormone receptor activity	0.00717	0.0254	4/242 1.6%	NR4A1,AR,RARA,ESR1
nuclear hormone receptor binding	0.00798	0.0281	5/242 2.0%	CALR,EP300,RB1,MED1,CTNNB1
cyclic nucleotide-dependent protein kinase activity	0.00819	0.0284	2/242 0.8%	PRKACA,PRKG1
Notch binding	0.00819	0.0284	2/242 0.8%	NCOR2,JAG1
protein domain specific binding	0.00835	0.0288	13/242 5.3%	PTK2,PTEN,SRC,PTPN11,ZBTB16,RARA,TP63,JAK2,BAIAP2,GRB2,AR,LCK,CDH1,
ligand-dependent nuclear receptor activity	0.00884	0.0303	4/242 1.6%	NR4A1,AR,RARA,ESR1
3',5'-cyclic-AMP phosphodiesterase activity	0.0101	0.0338	2/242 0.8%	PDE3B,PDE4A
general transcriptional repressor activity	0.0101	0.0338	2/242 0.8%	CBX5,HHEX
phosphotyrosine binding	0.0101	0.0338	2/242 0.8%	GRB2,MAPK3
receptor tyrosine kinase binding	0.0101	0.0338	2/242 0.8%	ANGPT2,ANGPT1
peptide hormone binding	0.0103	0.0341	3/242 1.2%	PIK3R1,NPR3,NPR1,
androgen receptor binding	0.0113	0.0369	3/242 1.2%	CALR,RB1,CTNNB1
chaperone binding	0.0113	0.0369	3/242 1.2%	CALR,VWF,TP53
DNA binding	0.0113	0.0369	50/242 20.6%	MEF2C,JUN,MEF2D,TWIST1,SRF,HHEX,FOXO4,STAT3,MEF2A,ZBTB16,STAT1,TNF,RARA,PML,ESR1,CREBBP,MEIS1,TP73,NCOR2,HOXA5,TP63,RB1,ARRB1,ARNT,SMAD3,KLF4,SMAD4,MYC,SMAD2,IRF3,RUNX3,GATA2,PBX1,EP300,RELA,GATA6,CTNNB1,AR,CALR,YY1,FOXO1,SP1,TP53,EGR3,MED1,APP,NR4A1,HDAC1,FOS,GTF2I
transcription cofactor activity	0.0122	0.0389	12/242 4.9%	JUN,IRF3,NCOR2,YY1,ARNT,EP300,CREBBP,RARA,RB1,PML,MED1,CTNNB1
cyclin-dependent protein kinase inhibitor activity	0.0123	0.0389	2/242 0.8%	CDKN1A,CASP3
fibronectin binding	0.0123	0.0389	2/242 0.8%	ITGA4,THBS1
histone acetyltransferase binding	0.0123	0.0389	2/242 0.8%	SP1,TP53
tumor necrosis factor receptor superfamily binding	0.0124	0.039	3/242 1.2%	FASLG,TNF,TNFSF10,
structural molecule activity	0.0149	0.0426	17/242 7.0%	COL4A1,COL4A2,COL4A3,GFAP,FN1,THBS4,MSN,JAG1,LAMB3,FBLN2,COL1A1,THBS3,THBS2,THBS1,MYOC,MBP,ROCK2,
3-phosphoinositide-dependent protein kinase activity	0.0157	0.0426	1/242 0.4%	PDPK1
calcium-dependent protein kinase C activity	0.0157	0.0426	1/242 0.4%	PRKCA,
calcium-dependent protein serine/threonine kinase activity	0.0157	0.0426	1/242 0.4%	PRKCA
CD8 receptor binding	0.0157	0.0426	1/242 0.4%	LCK
diuretic hormone activity	0.0157	0.0426	1/242 0.4%	NPPB,
erythropoietin receptor activity	0.0157	0.0426	1/242 0.4%	EPOR
estrogen response element binding	0.0157	0.0426	1/242 0.4%	ESR1
fibrinogen binding	0.0157	0.0426	1/242 0.4%	THBS1,
fibroblast growth factor 2 binding	0.0157	0.0426	1/242 0.4%	THBS1
ghrelin receptor binding	0.0157	0.0426	1/242 0.4%	GHRL
histone kinase activity (H3-Y41 specific)	0.0157	0.0426	1/242 0.4%	JAK2
histone tyrosine kinase activity	0.0157	0.0426	1/242 0.4%	JAK2,
inositol-1,3,4,5-tetrakisphosphate 3-phosphatase activity	0.0157	0.0426	1/242 0.4%	PTEN
interleukin-11 binding	0.0157	0.0426	1/242 0.4%	IL6ST
interleukin-11 receptor activity	0.0157	0.0426	1/242 0.4%	IL6ST
MRF binding	0.0157	0.0426	1/242 0.4%	CREBBP
MyoD binding	0.0157	0.0426	1/242 0.4%	CREBBP,
neuropeptide Y receptor binding	0.0157	0.0426	1/242 0.4%	NPY
oncostatin-M receptor binding	0.0157	0.0426	1/242 0.4%	OSM,
phosphatidylinositol-3,4-bisphosphate 3-phosphatase activity	0.0157	0.0426	1/242 0.4%	PTEN
POU domain binding	0.0157	0.0426	1/242 0.4%	AR
serine-type aminopeptidase activity	0.0157	0.0426	1/242 0.4%	F12,
transforming growth factor beta receptor, common-partner cytoplasmic mediator activity	0.0157	0.0426	1/242 0.4%	SMAD4,
type III transforming growth factor beta receptor binding	0.0157	0.0426	1/242 0.4%	TGFBR2,
U-plasminogen activator receptor activity	0.0157	0.0426	1/242 0.4%	PLAUR,
exopeptidase activity	0.134	0.21	#N/A	#N/A
